# Supplementary material for: The Health-Promoting Potential of Salix spp. Bark Polar Extracts: Key Insights on Phenolic Composition and In Vitro Bioactivity and Biocompatibility
Source: PubMed Central journal article supplement (PMC6943414; doi:10.3390/antiox8120609), 2019-11-30
Supplement: antioxidants-08-00609-s001.pdf [file antioxidants-08-00609-s001.pdf]

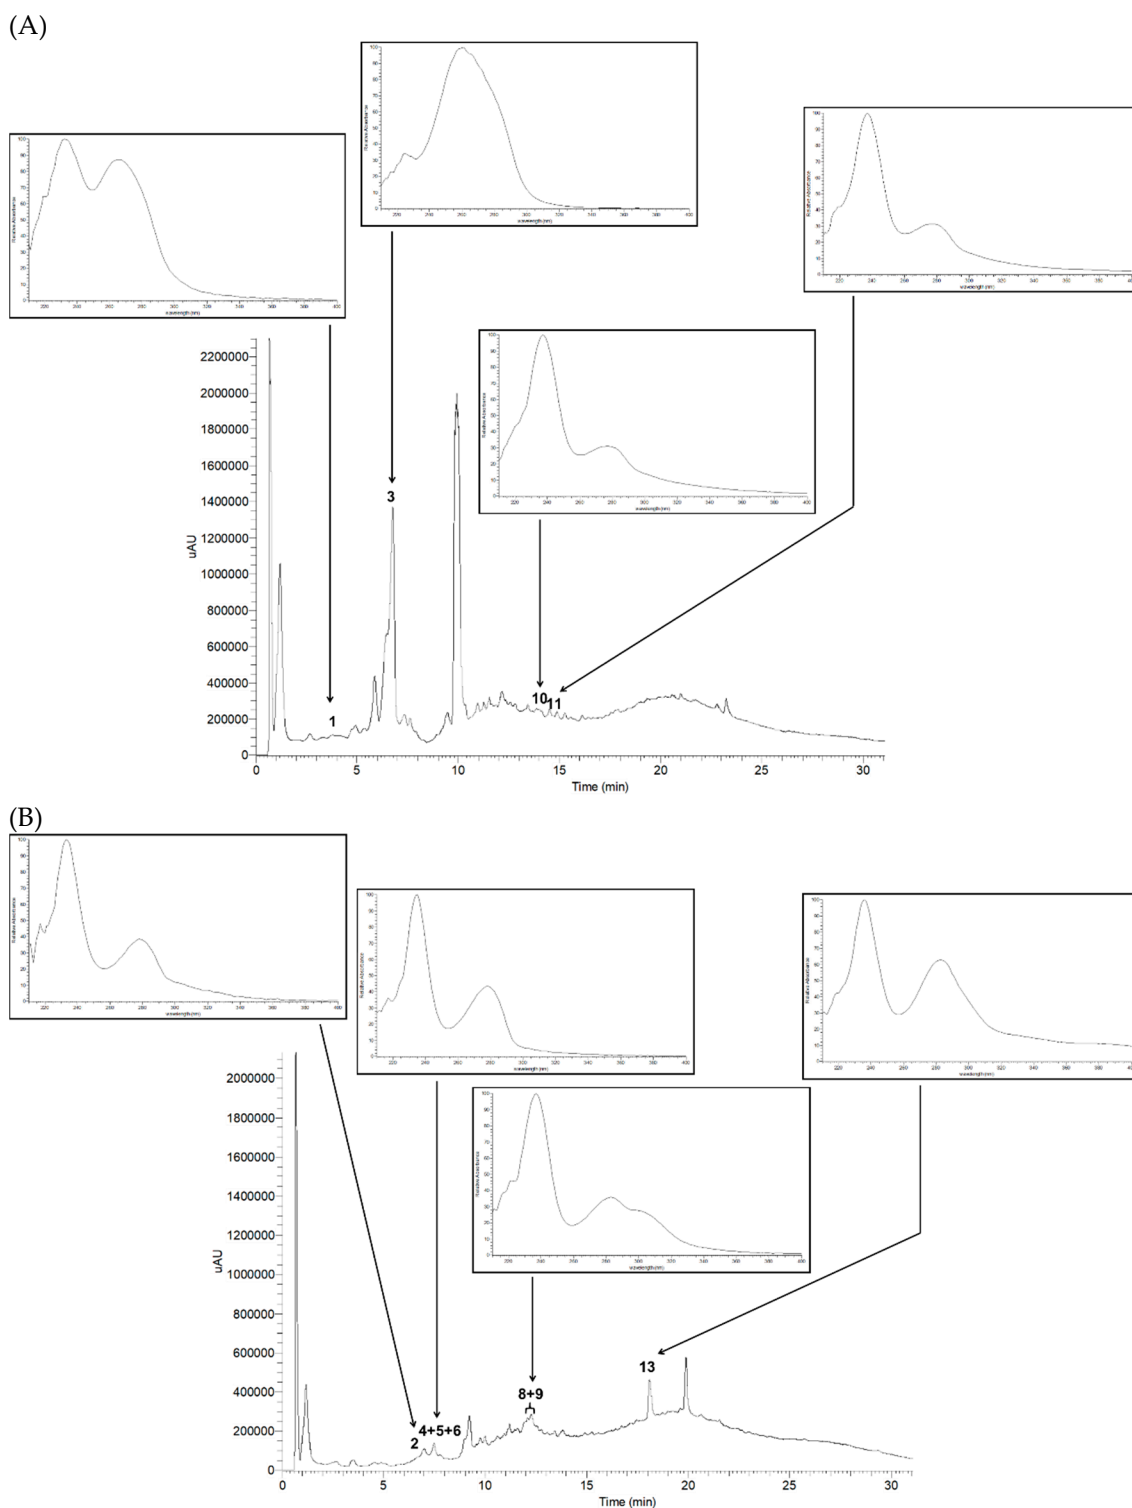

**Figure S1.** UHPLC-UV chromatograms of methanol/water/acetic acid (49.5:49.5:1) extracts, from (A) *Salix atrocinerea* Brot. and (B) *Salix viminalis* L. barks, recorded at 280 nm. The peak numbers correspond to compounds 1–6, 8–11 and 13. The molecular absorption UV spectra of these compounds are also depicted.

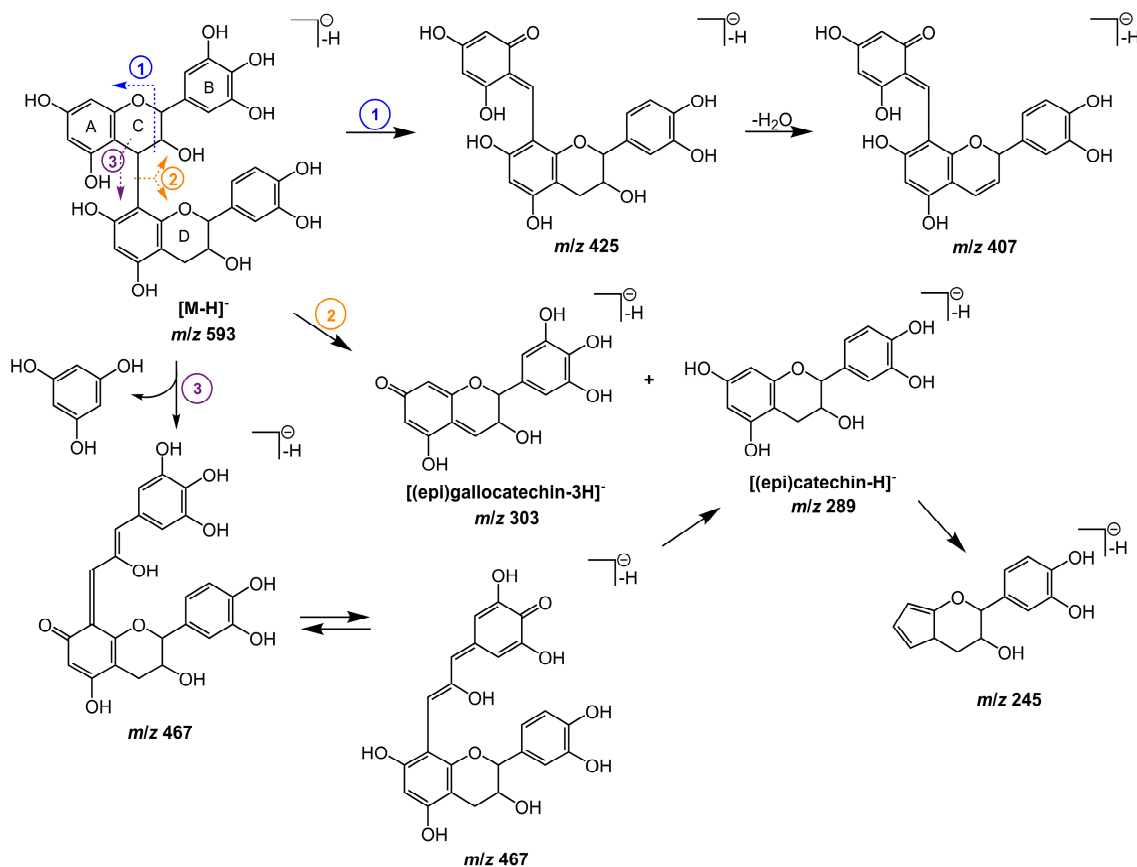

**Figure S2.** Mass fragmentation of a prodelpinidin dimer isomer, under negative ionization mode [1,2].

## References

1. Cheynier, V. Flavonoids in wine. In *Flavonoids: chemistry, biochemistry, and applications*; Andersen, Ø.M., Markham, K.R., Eds.; CRC Press: Boca Raton, 2006; pp. 263–318.
2. Jian, Y.; Liu, R.; Chen, J.; Liu, M.; Liu, M.; Liu, B.; Yi, L.; Liu, S. Application of multifold characteristic ion filtering combined with statistical analysis for comprehensive profiling of chemical constituents in anti-renal interstitial fibrosis I decoction by ultra-high performance liquid chromatography coupled with hybrid quadrupole-orbitrap high resolution mass spectrometry. *J. Chromatog. A*, **2019**, *1600*, 197-208.
